# Supplementary material for: Chimeric antigen receptor T cells targeting CD147 for non-small cell lung cancer therapy
Source: PubMed Central journal article supplement — Transl Oncol. 2021 Dec 9;16:101309. doi: 10.1016/j.tranon.2021.101309 (PMC8681039; doi:10.1016/j.tranon.2021.101309), 2021-12-09

Raw data for Fig. 2A

CD147 (HAb18,  
produced by our lab)

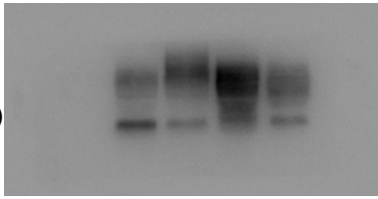

$\beta$ -actin

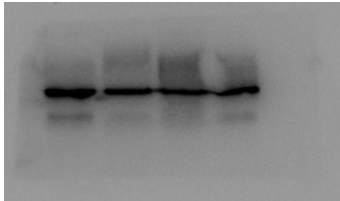

Raw data for Fig. S2A

CD147 (obtained  
from CST, 13287S)

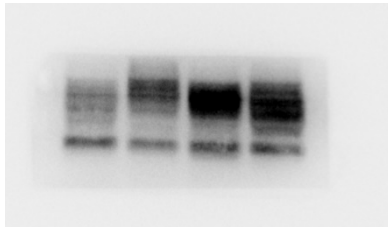

$\beta$ -actin

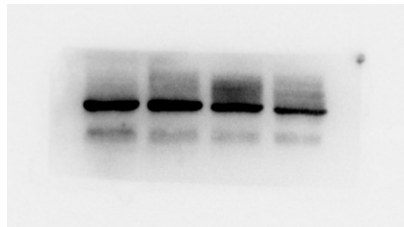

Supplement: mmc2.pdf [file mmc2.pdf]
